# Supplementary material for: CO2 Absorption Mechanism by the Deep Eutectic Solvents Formed by Monoethanolamine-Based Protic Ionic Liquid and Ethylene Glycol
Source: MDPI journal article supplement (doi:10.3390/ijms23031893), 2022-02-08
Supplement: s1 [file s1]

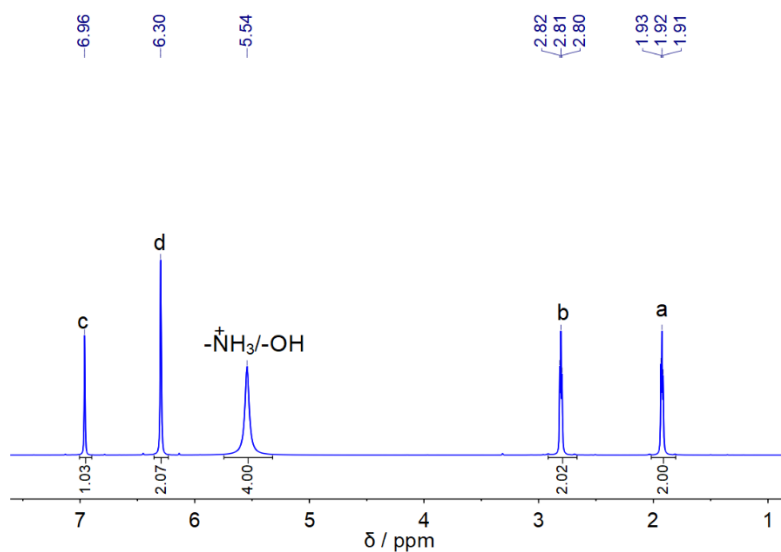

**Figure S1.** The  $^1\text{H}$  NMR spectra of [MEA][Im].

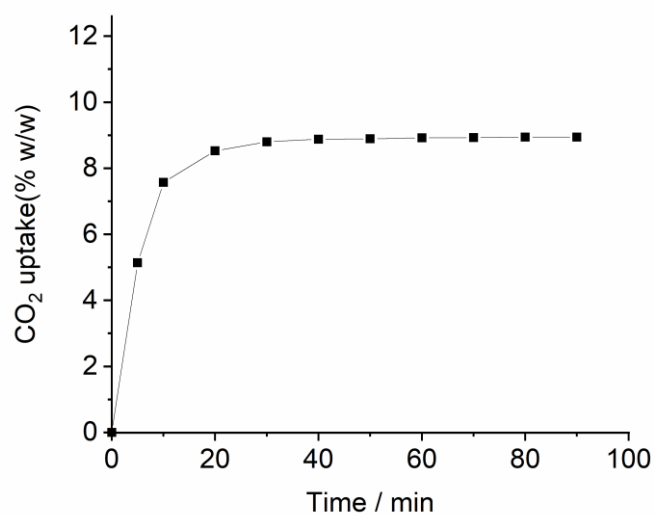

**Figure S2.**  $\text{CO}_2$  absorption by [MEA][Im]-EG (1:3) at 25 °C and 1.0 atm.

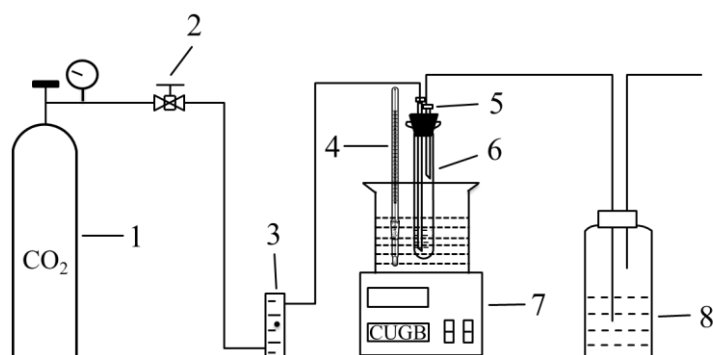

**Figure S3.** Schematic diagram of  $\text{CO}_2$  absorption apparatus. 1, gas cylinder; 2, needle valve; 3, gas flowmeter; 4, thermometer; 5, needle; 6, glass tube; 7, digital thermostat water bath; 8, NaOH aqueous solution.
